# Supplementary material for: Fold Designability, Distribution, and Disease
Source: PLOS journal article supplement (doi:10.1371/journal.pcbi.0020040), 2006-05-01
Supplement: S3 (10.1371/journal.pcbi.0020040.s003) [file journal.pcbi.0020040.s003]

**Protocol S3: List of Common Disease Proteins**

Common disease proteins with detectable SCOP folds are listed here. An * in the fold column indicates that the SCOP definition highly covers the protein (see Methods).

ENSEMBL Protein Folds Associated OMIM Disease Annotation

ensp00000217961 c.76 Ichthyosis X-linked (3),Placental steroid sulfatase deficiency (3)

ensp00000218195 f.13* Colorblindness blue/protan (3),Rubenstein-Taybi syndrome 180849 (3)

ensp00000229264 b.69* {Hypertension essential susceptibility to} 145500 (3)

ensp00000233242 a.118,f.7 Abetalipoproteinemia (3),Apolipoprotein B-100 ligand-defective (3),Hyperbetalipoproteinemia (3),Hypobetalipoproteinemia (3)

ensp00000236260 e.1* Antithrombin III deficiency (3)

ensp00000246337 c.1* Porphyria cutanea tarda (3),Porphyria hepatoerythropoietic (3)

ensp00000249389 f.13* Colorblindness tritan (3)

ensp00000252444 b.68,g.3,g.12 Hypercholesterolemia familial(3)

ensp00000256993 b.1 Cardiomyopathy familial hypertrophic 4 115197 (3),Hypercholesterolemia familial (3)

ensp00000260682 a.104* Tolbutamide poor metabolizer (3)

ensp00000261733 c.82* Alcohol intolerance acute (3),{?Fetal alcohol syndrome} (1)

ensp00000262367 g.53,a.12,a.29,a.153 Rubenstein-Taybi syndrome 180849 (3),Colorblindness protan (3),Rett syndrome (2) (?),Rothmund-Thomson syndrome (2) (?)

ensp00000264381 c.69 Apnea postanesthetic (3)

ensp00000264691 b.47 Factor XI deficiency (3)

ensp00000267071 a.170,b.40,a.171,b.40 Breastcancer 2 early onset (3),Pancreatic cancer (3),

Fanconi anemia type D (2)

ensp00000276343 f.13* Colorblindness blue monochromatic (3),Colorblindness deutan (3)

ensp00000276348 f.13* Colorblindness blue monochromatic (3),Colorblindness deutan (3)

ensp00000289928 b.1 Charcot-Marie-Tooth neuropathy-1B 118200 (3),

Dejerine-Sottas disease myelin P(0)-related 145900 (3),Hypomyelination congenital (3)

ensp00000292301 f.13* {HIV infection susceptibility/resistence to} (3)

ensp00000292303 f.13* {HIV infection susceptibility/resistance to} (3)

ensp00000292888 b.1 Nephrosis-1 congenital Finnish type 256300 (3)

ensp00000298844 e.1* Emphysema (3),Emphysema-cirrhosis (3),

Hemorrhagic diathesis due to `antithrombin' Pittsburgh (3)

ensp00000299367 b.47,g.18 C2 deficiency (3)

ensp00000301141 a.104* Coumarin resistance 122700 (3),{Nicotine addiction protection from} (3)

ensp00000306780 f.13.1,c.10 Ovarian dysgenesis hypergonadotropic with normal karyotype 233300 (3)

ensp00000314508 c.1,b.71 Gaucher disease (3),Gaucher disease with cardiovascular calcification (3)

ensp00000331327 g.37 Denys-Drash syndrome (3),Frasier syndrome 136680 (3),Wilms tumor type 1 (3)

ensp00000334146 g.37 Factor XI deficiency (3)

ensp00000340258 b.1 {Atopy susceptibility to} (3)

ensp00000342362 d.81,c.2 Favism (3),G6PD deficiency (3),Hemolytic anemia due to G6PD deficiency (3)

ensp00000343985 f.13* {HIV infection susceptibility/resistance to} (3)

ensp00000344419 a.93 Myeloperoxidase deficiency (3)

ensp00000344867 f.13 {HIV infection susceptibility/resistence to} (3)
