# Supplementary figures and images for: Fold Designability, Distribution, and Disease
Source: PLOS journal article supplement (doi:10.1371/journal.pcbi.0020040), 2006-05-01

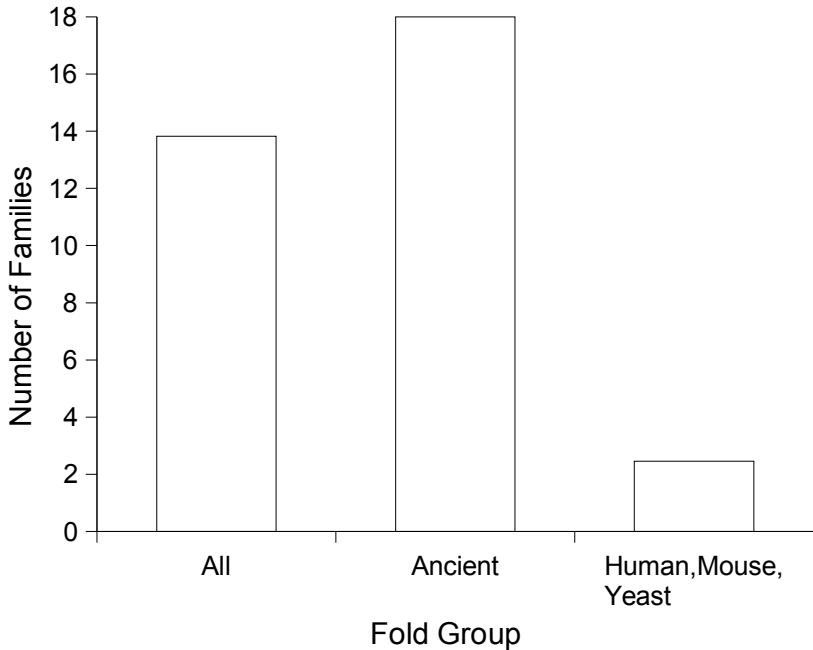

Supplement: S1 (10.1371/journal.pcbi.0020040.s001) [file journal.pcbi.0020040.s001]

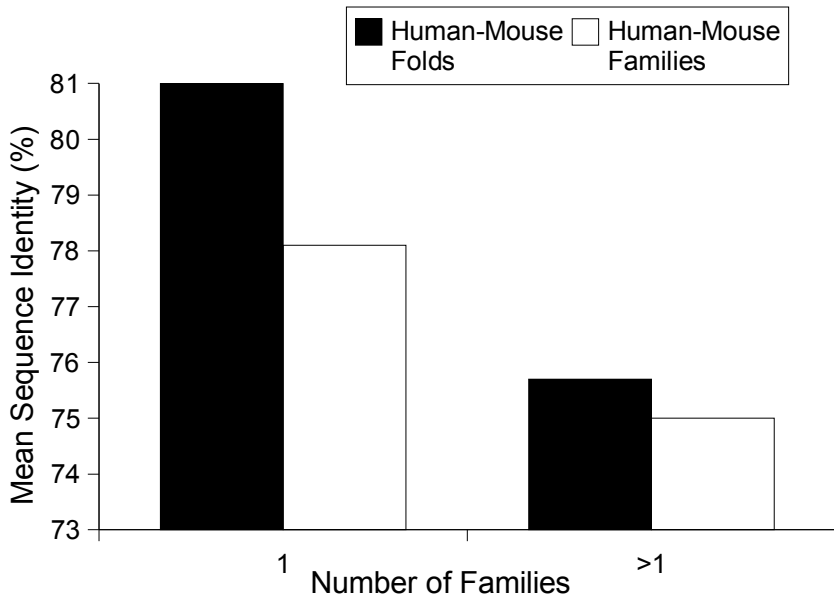

Supplement: S2 (10.1371/journal.pcbi.0020040.s002) [file journal.pcbi.0020040.s002]

Mean Family Duplication

Human Mouse Yeast

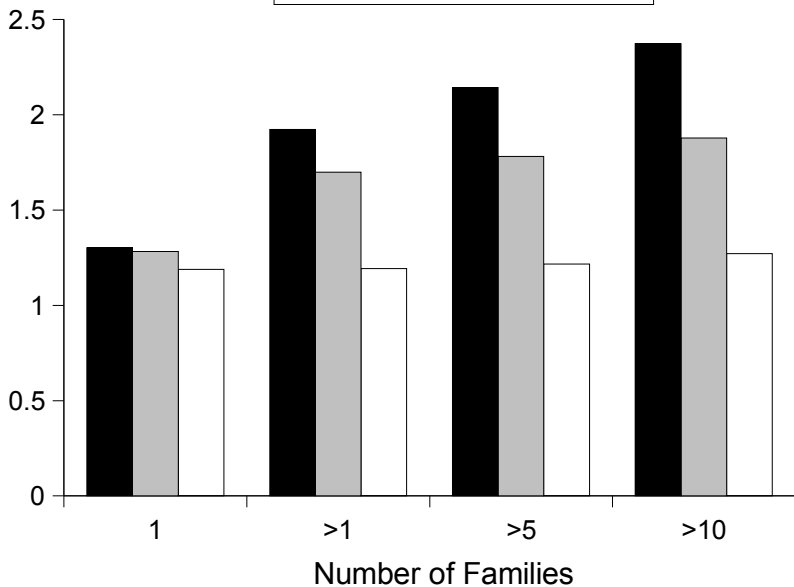

Supplement: S5 (10.1371/journal.pcbi.0020040.s005) [file journal.pcbi.0020040.s005]

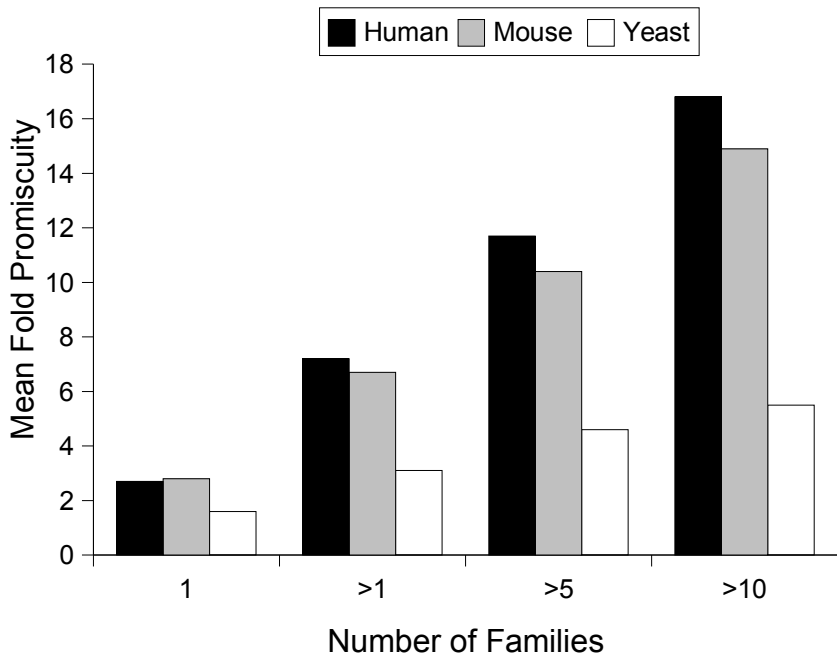

Supplement: S7 (10.1371/journal.pcbi.0020040.s007) [file journal.pcbi.0020040.s007]

Mean Family Promiscuity

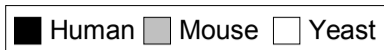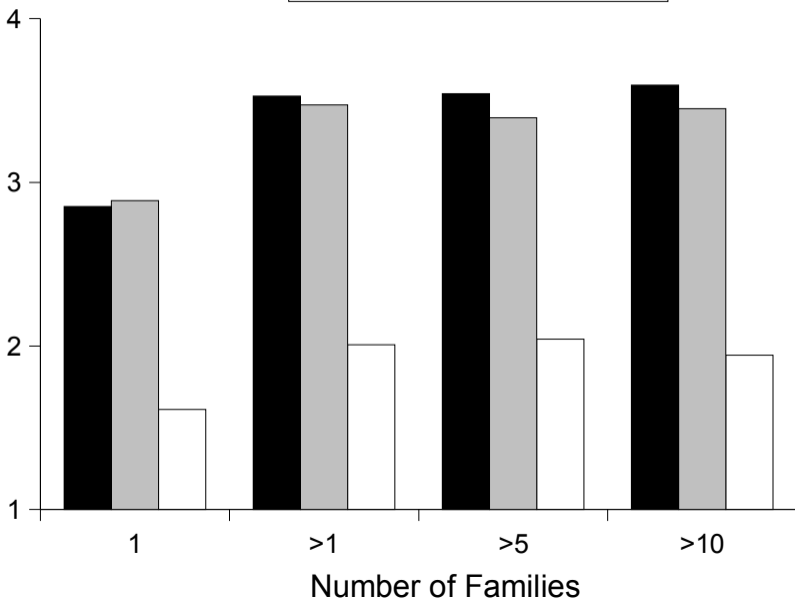

Supplement: S9 (10.1371/journal.pcbi.0020040.s009) [file journal.pcbi.0020040.s009]

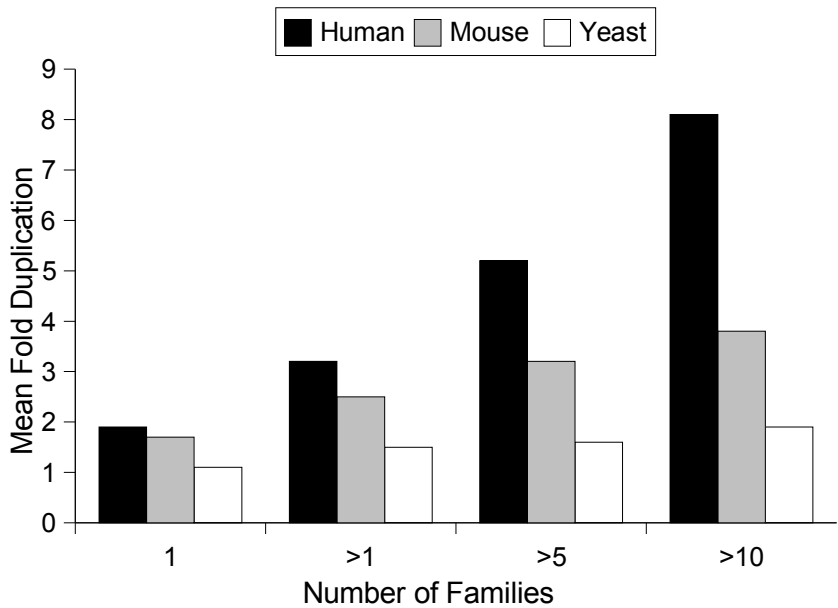

Supplement: S10 (10.1371/journal.pcbi.0020040.s010) [file journal.pcbi.0020040.s010]

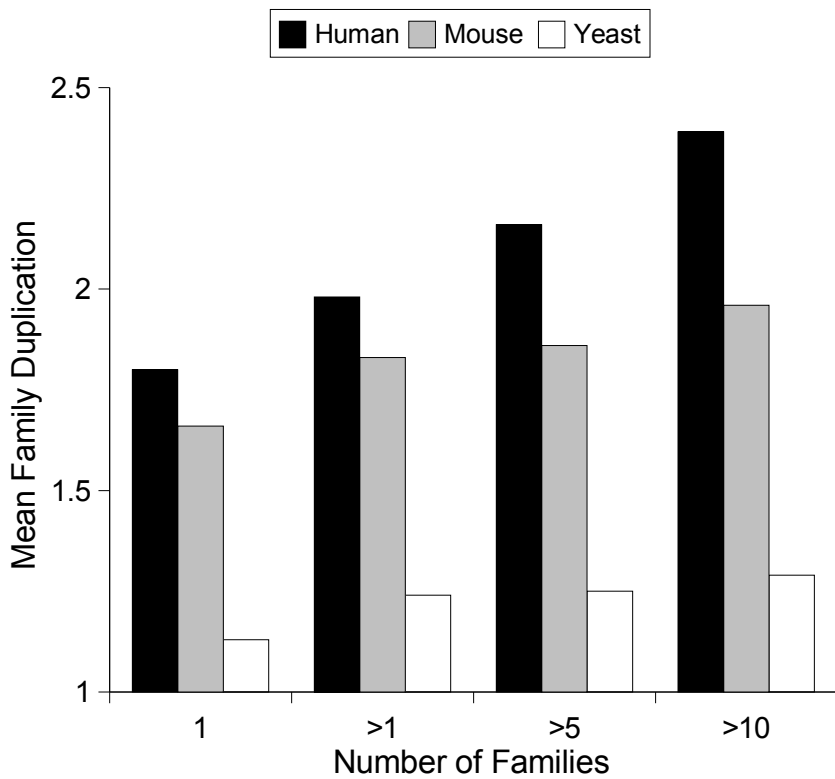

Supplement: S11 (10.1371/journal.pcbi.0020040.s011) [file journal.pcbi.0020040.s011]

Mean Family Occurrence

■ *E. coli*    ■ *Yersinia*    □ *Vibrio*

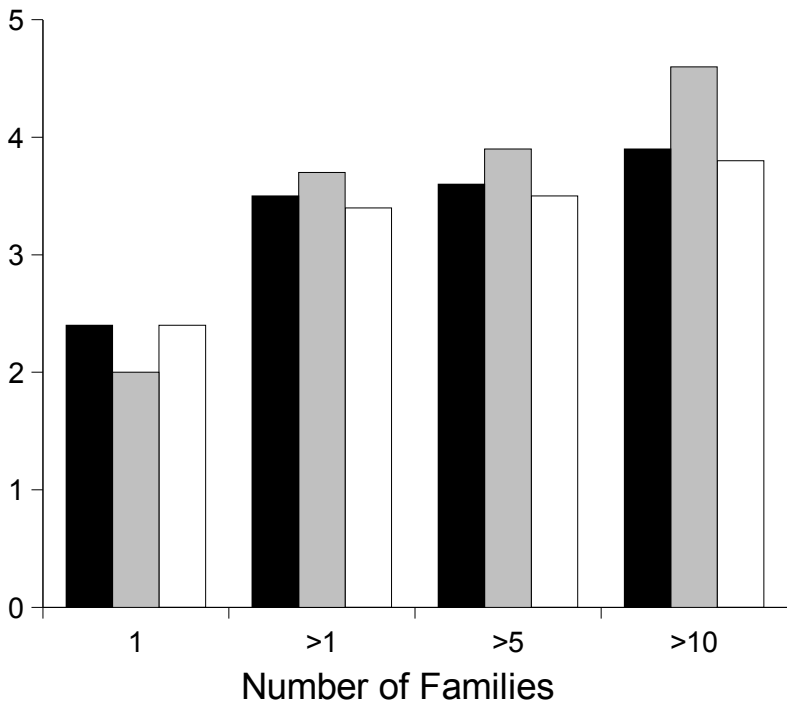

Supplement: S15 (10.1371/journal.pcbi.0020040.s015) [file journal.pcbi.0020040.s015]

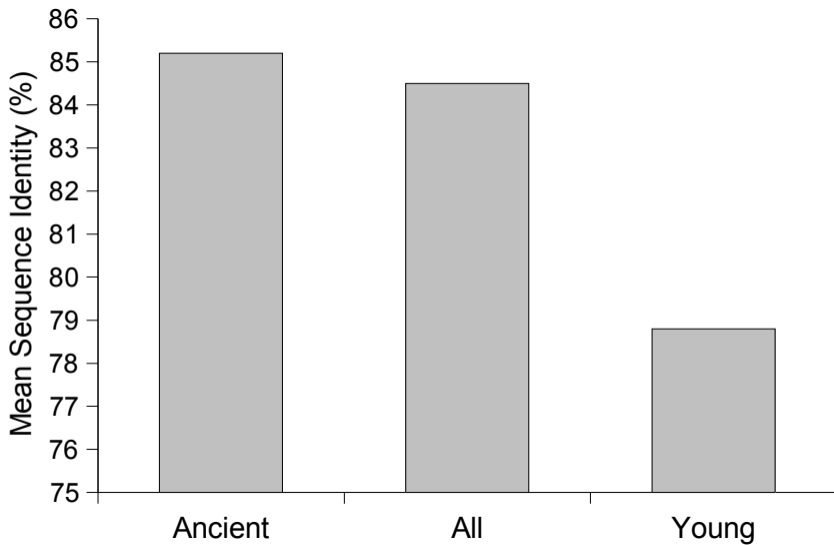

Supplement: S18 (10.1371/journal.pcbi.0020040.s018) [file journal.pcbi.0020040.s018]

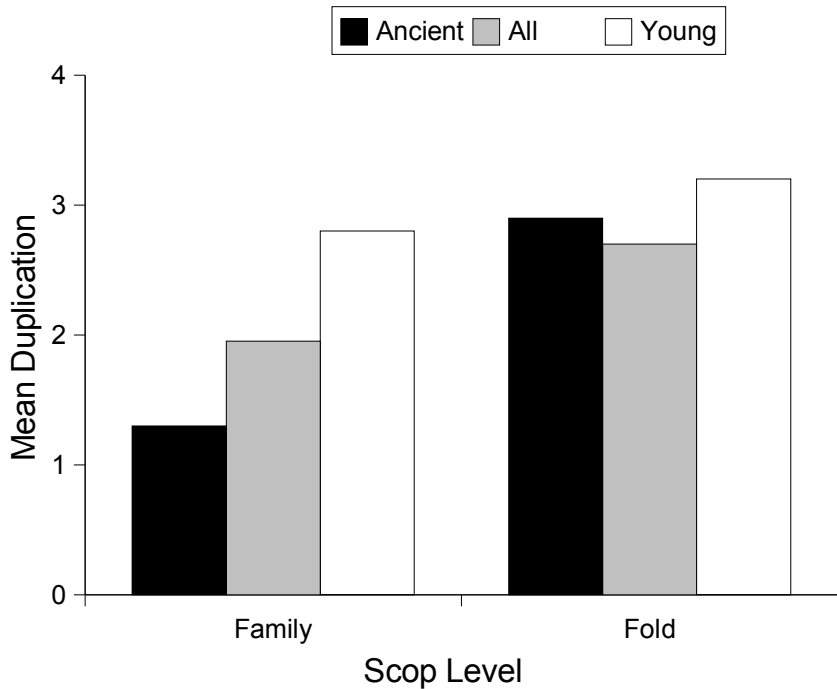

Supplement: S20 (10.1371/journal.pcbi.0020040.s020) [file journal.pcbi.0020040.s020]

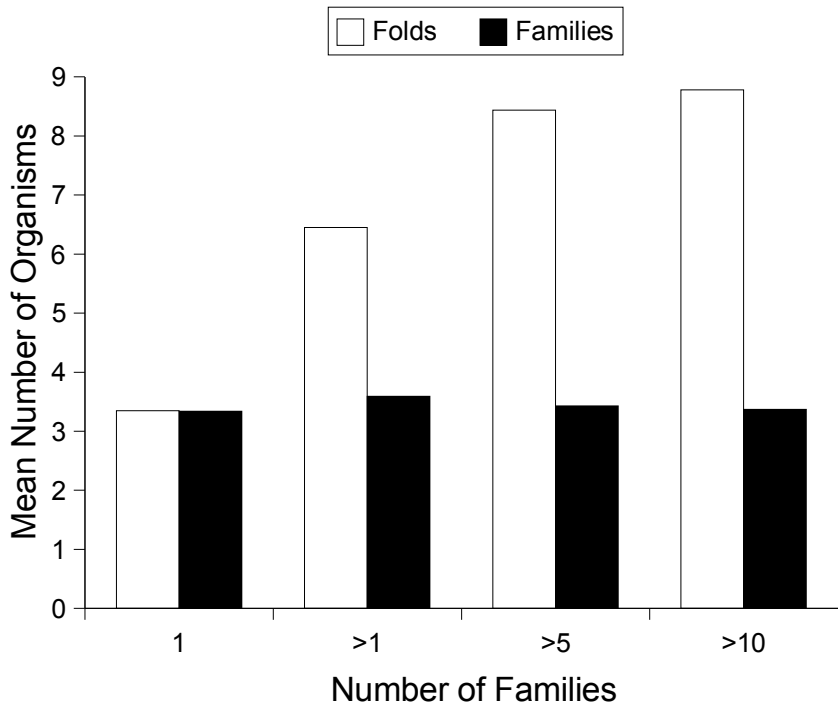

Supplement: S24 (10.1371/journal.pcbi.0020040.s024) [file journal.pcbi.0020040.s024]
